# Supplementary material
Source: MDPI journal article supplement (https://www.mdpi.com/2227-9717/8/9/1110)

**Figure S1.** Flow chart on the production of LP

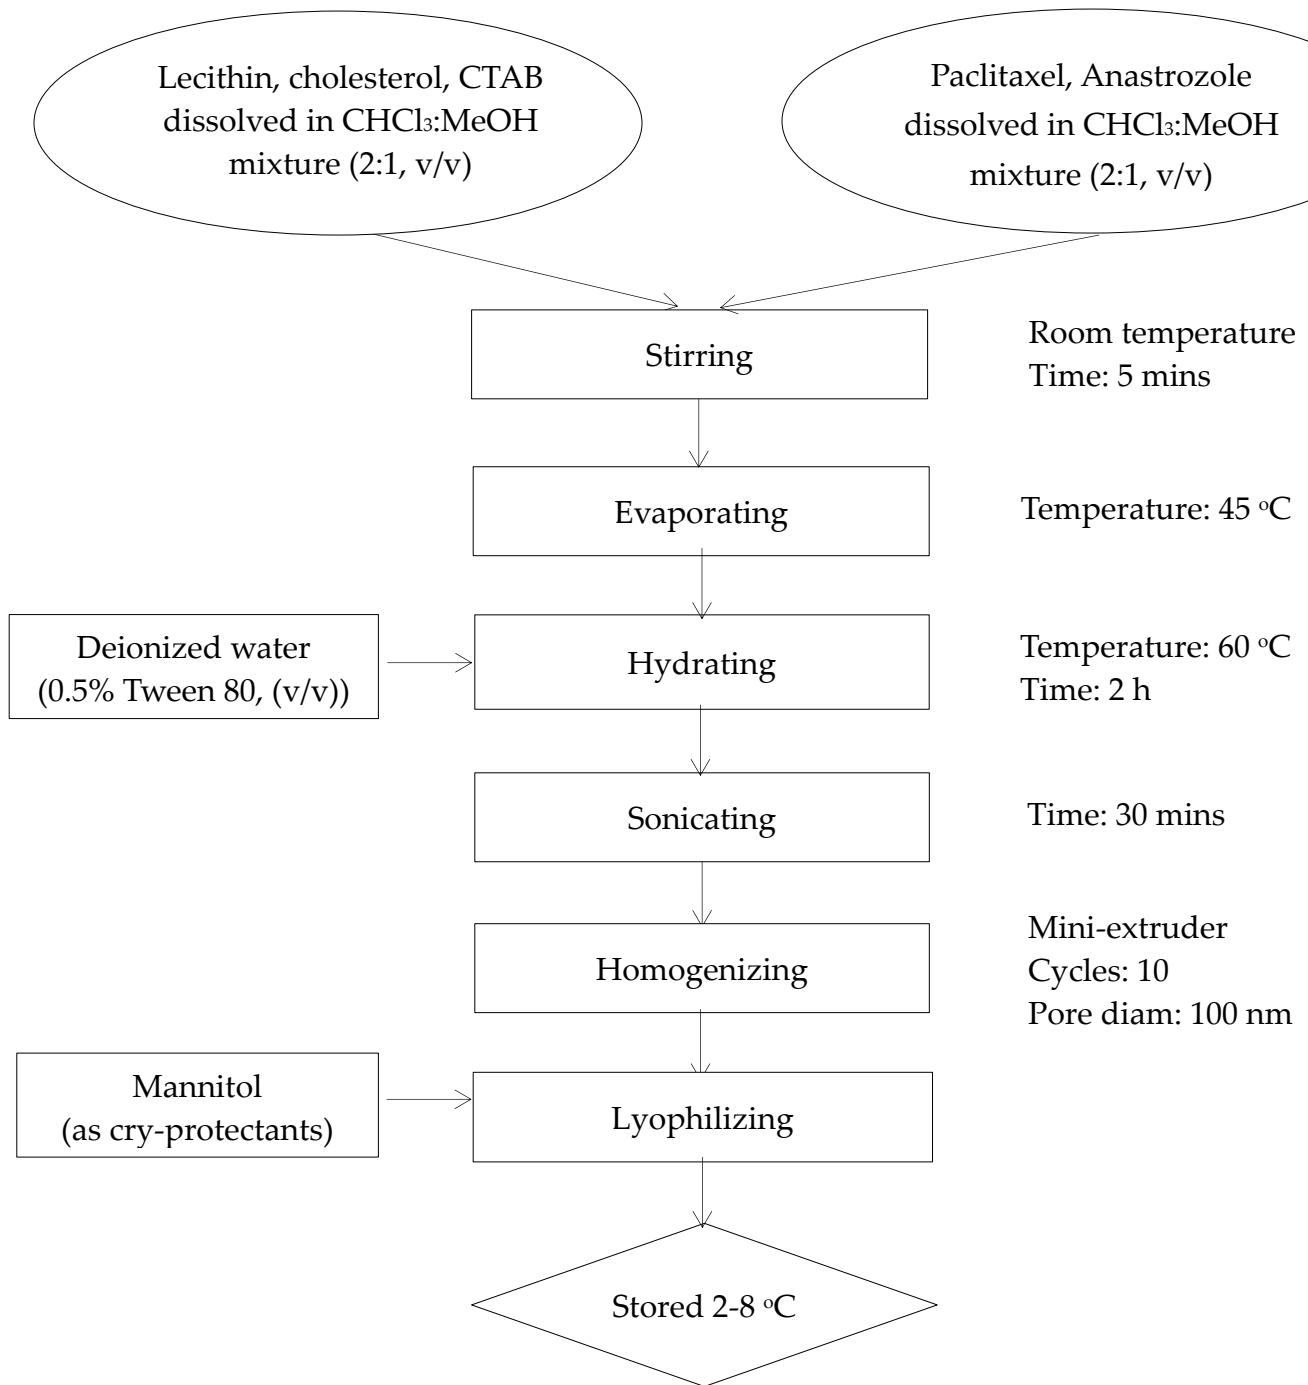

Supplement: s1 [file s1]
